# Supplementary material for: Metabolomic Study of a Rat Model of Retinal Detachment
Source: MDPI journal article supplement (doi:10.3390/metabo12111077), 2022-11-07
Supplement: s1 [file s1]

**Table S1.** Summaries of the Abbreviations and Full names in the text

| Abbreviations | Full Name                                              |
|---------------|--------------------------------------------------------|
| RD            | Retinal detachment                                     |
| GEO           | Gene Expression Omnibus                                |
| ACLY          | ATP-citrate lyase enzyme                               |
| RPE           | retinal pigment epithelium                             |
| PVR           | proliferative vitreoretinopathy                        |
| AGC           | automatic gain control                                 |
| IT            | injection time                                         |
| KEGG          | Kyoto Encyclopedia of Genes and Genomes                |
| PLS-DA        | partial least squares discriminant analysis            |
| OPLS-DA       | orthogonal partial least squares discriminant analysis |
| LOOCV         | leave-one-out cross-validation                         |
| VIP           | variable importance                                    |
| PCA           | Principal component analysis                           |
| FC            | fold change                                            |
| SAH           | S-adenosylhomocysteine                                 |
| SAM           | S-adenosylmethionine                                   |
| XDH           | xanthine dehydrogenase                                 |
| PFK1          | phosphofructokinase 1                                  |
| PDH1          | pyruvate dehydrogenase 1                               |
| PHA           | phenylalanine hydroxylase                              |
| TH            | Tyrosine hydroxylase                                   |
| L-DOPA        | L-3,4-dihydroxyphenylalanine                           |
| BRB           | blood–retinal barrier                                  |
| ICMT          | isoprenylcysteine carboxyl methyltransferase           |
| XO            | Xanthine oxidase                                       |
| PNP           | purine nucleoside phosphorylase                        |
| IMPDH1        | inosine-5'-monophosphate dehydrogenase 1               |
| IMP           | inosine monophosphate                                  |
| TYR1          | tyrosinase-related protein1                            |
| PDH           | pyruvate dehydrogenase                                 |
| TCA           | tricarboxylic acid                                     |
