# Supplementary material for: Metabolomic Study of a Rat Model of Retinal Detachment
Source: Metabolites. 2022 Nov 7;12(11):1077. doi: 10.3390/metabo12111077 (PMC9699637; doi:10.3390/metabo12111077)
Supplement: Supplementary file 1 [file metabolites-12-01077-s001.zip]

Archive with 10 entries (9 files):
- Supplemenraty Figure S1/
- Supplemenraty Figure S1/SF1-AInosine.png
- Supplemenraty Figure S1/SF1-BL-Carnitine.png
- Supplemenraty Figure S1/SF1-CL-Tyrosine.png
- Supplemenraty Figure S1/SF1-DFumaric acid.png
- Supplemenraty Figure S1/SF1-E Adenine.png
- Supplemenraty Figure S1/SF1-F L-Tryptophan.png
- Supplemenraty Figure S1/SF1-G-Phenylalannine.png
- Supplemenraty Figure S1/SF1-H Linoleic acid.png
- Supplemenraty Table S1 Abbreviations.pdf
